# Supplementary material for: Identification and Characterization of a QTL for Growth of Fusarium circinatum on Pine-Based Medium
Source: MDPI journal article supplement (doi:10.3390/jof8111214), 2022-11-16
Supplement: s1 [file s1]

# Identification and characterization of a QTL for growth of *Fusarium circinatum* on pine-based medium

Benedicta S. Swalarsk-Parry<sup>1</sup>, E.T. Steenkamp<sup>1</sup>, S. van Wyk<sup>1</sup>, Q.C. Santana<sup>1,2</sup>, M.A. van der Nest<sup>1,2</sup>, A. Hammerbacher<sup>3</sup>, B.D. Wingfield<sup>1</sup> and L. De Vos<sup>1</sup>

<sup>1</sup> Department of Biochemistry, Genetics and Microbiology, Forestry and Agricultural Biotechnology Institute (FABI), University of Pretoria, Pretoria 0002, South Africa.

<sup>2</sup> Agricultural Research Council, Biotechnology Platform, 100 Old Soutpan Road, Onderstepoort, Pretoria, South Africa.

<sup>3</sup> Department of Zoology and Entomology, Forestry and Agricultural Biotechnology Institute (FABI), University of Pretoria, Pretoria 0002, South Africa.

## Supplementary File S3

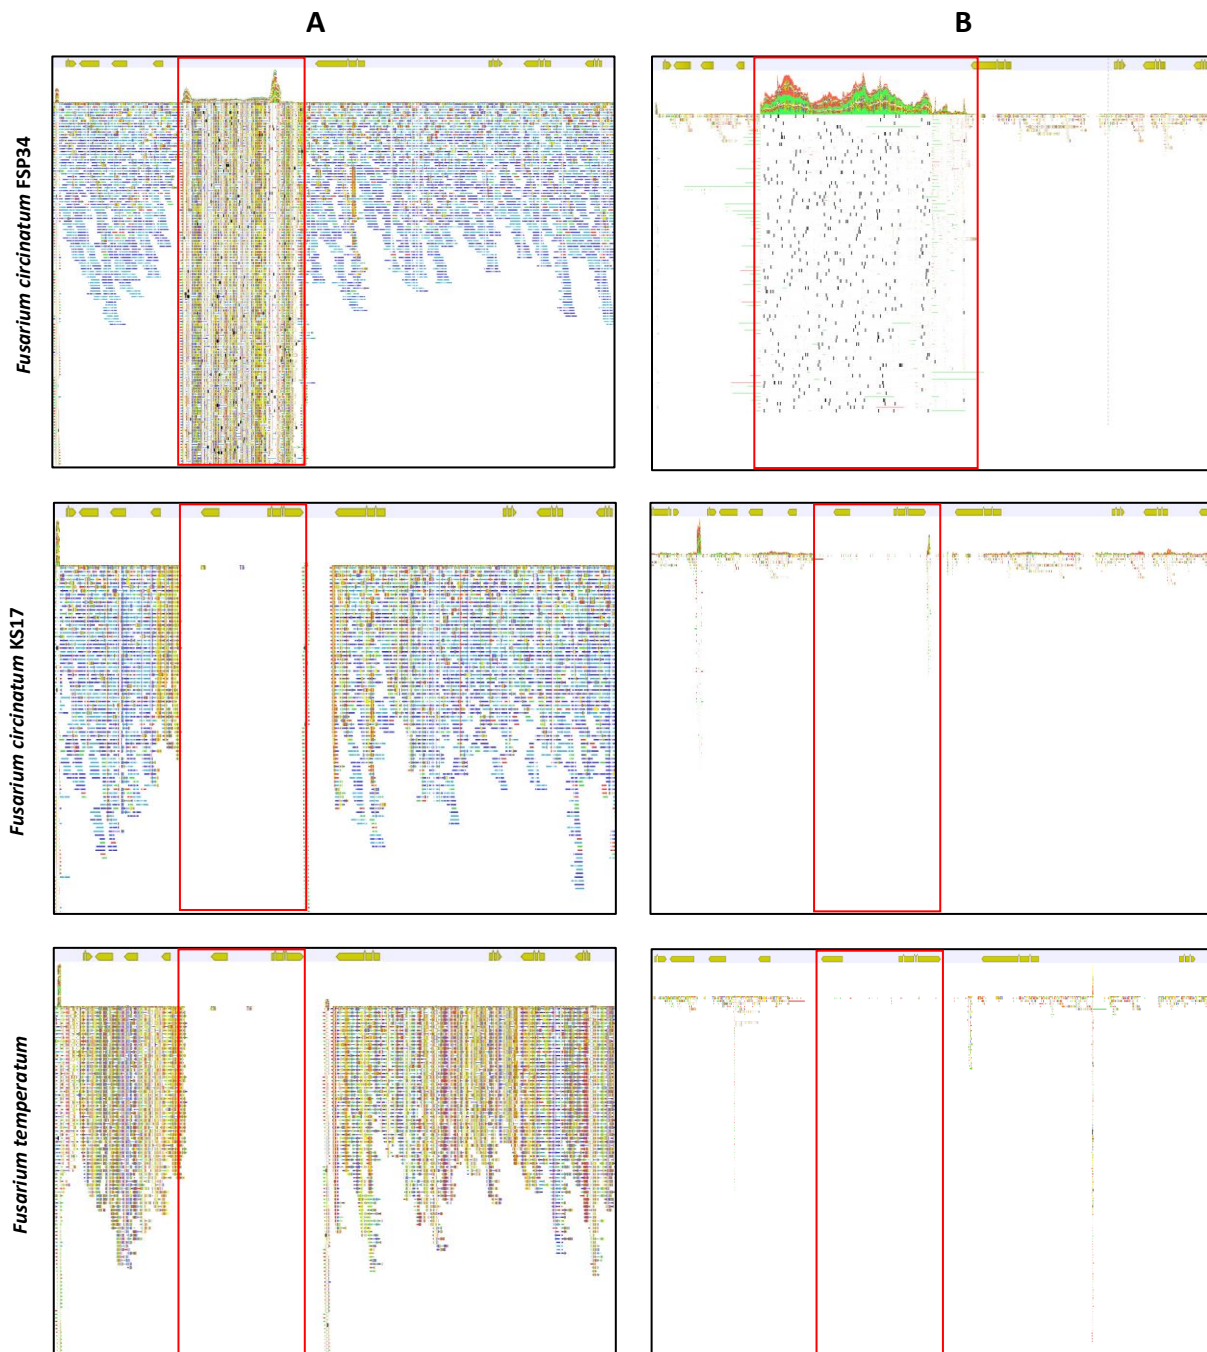

Reference mapping of *F. circinatum* (A) Illumina and (B) MinIon raw reads mapped to the genomes of *F. circinatum* (FSP34 & KS17) and *F. temperatum*. The red block indicates the location of the two gene indel and the coverage of the mapped reads.
