# Supplementary material for: Identification and Characterization of a QTL for Growth of Fusarium circinatum on Pine-Based Medium
Source: MDPI journal article supplement (doi:10.3390/jof8111214), 2022-11-16
Supplement: s1 [file s1]

## Identification and characterization of a QTL for growth of *Fusarium circinatum* on pine-based medium

Benedicta S. Swalarsk-Parry<sup>1</sup>, E.T. Steenkamp<sup>1</sup>, S. van Wyk<sup>1</sup>, Q.C. Santana<sup>1,2</sup>, M.A. van der Nest<sup>1,2</sup>, A. Hammerbacher<sup>3</sup>, B.D. Wingfield<sup>1</sup> and L. De Vos<sup>1</sup>

<sup>1</sup>Department of Biochemistry, Genetics and Microbiology, Forestry and Agricultural Biotechnology Institute (FABI), University of Pretoria, Pretoria 0002, South Africa.

<sup>2</sup>Agricultural Research Council, Biotechnology Platform, 100 Old Soutpan Road, Onderstepoort, Pretoria, South Africa.

<sup>3</sup>Department of Zoology and Entomology, Forestry and Agricultural Biotechnology Institute (FABI), University of Pretoria, Pretoria 0002, South Africa.

### Supplementary File S1

To obtain a broad overview of the metabolites conferred by the pine extract to the PMEA, High-Performance Liquid Chromatography (HPLC) were used according to Hammerbacher et al. (2014). The solidified media (i.e., containing pine extract and agar, but lacking malt extract) were separated on a Nucleodur Sphinx PR18ec column (Macherey-Nagel) by utilizing a flow rate of 1.0 ml.min<sup>-1</sup> on the Agilent 1100 series HPLC. The temperature of this column was kept constant at 25°C. To separate the phenolic compounds, 0.2% of formic acid and acetonitrile were used as the mobile phases. Furthermore, to quantify and identify the main compound groups, the Esquire 6000 ESI-ion trap mass spectrophotometer was utilized. These analyses showed that the medium had three main compound groups, namely primary metabolites, lignin-derived secondary metabolites, and flavonoid derived secondary metabolites (see figure below).

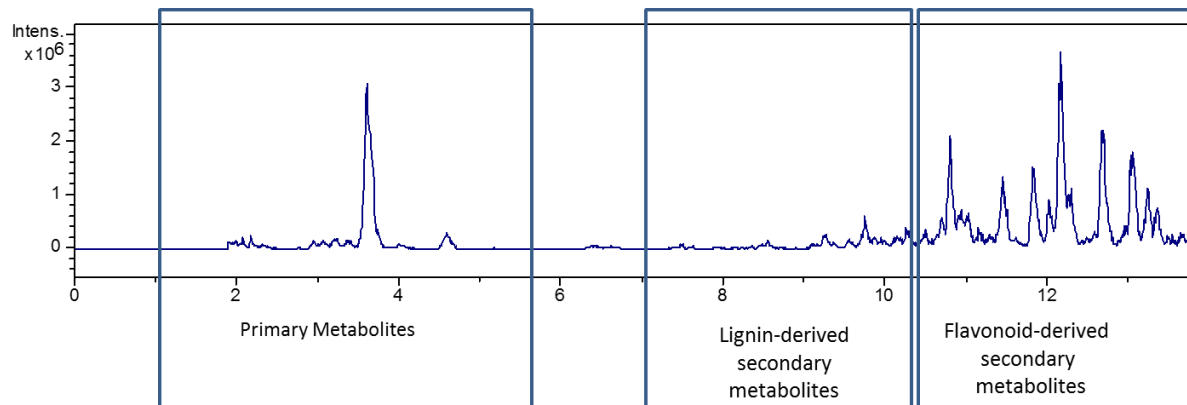

**HPLC results show the broad groups of metabolites detected in pine-based media. The Y-axis indicates the intensity of the peaks and the X-axis indicates time (min).**

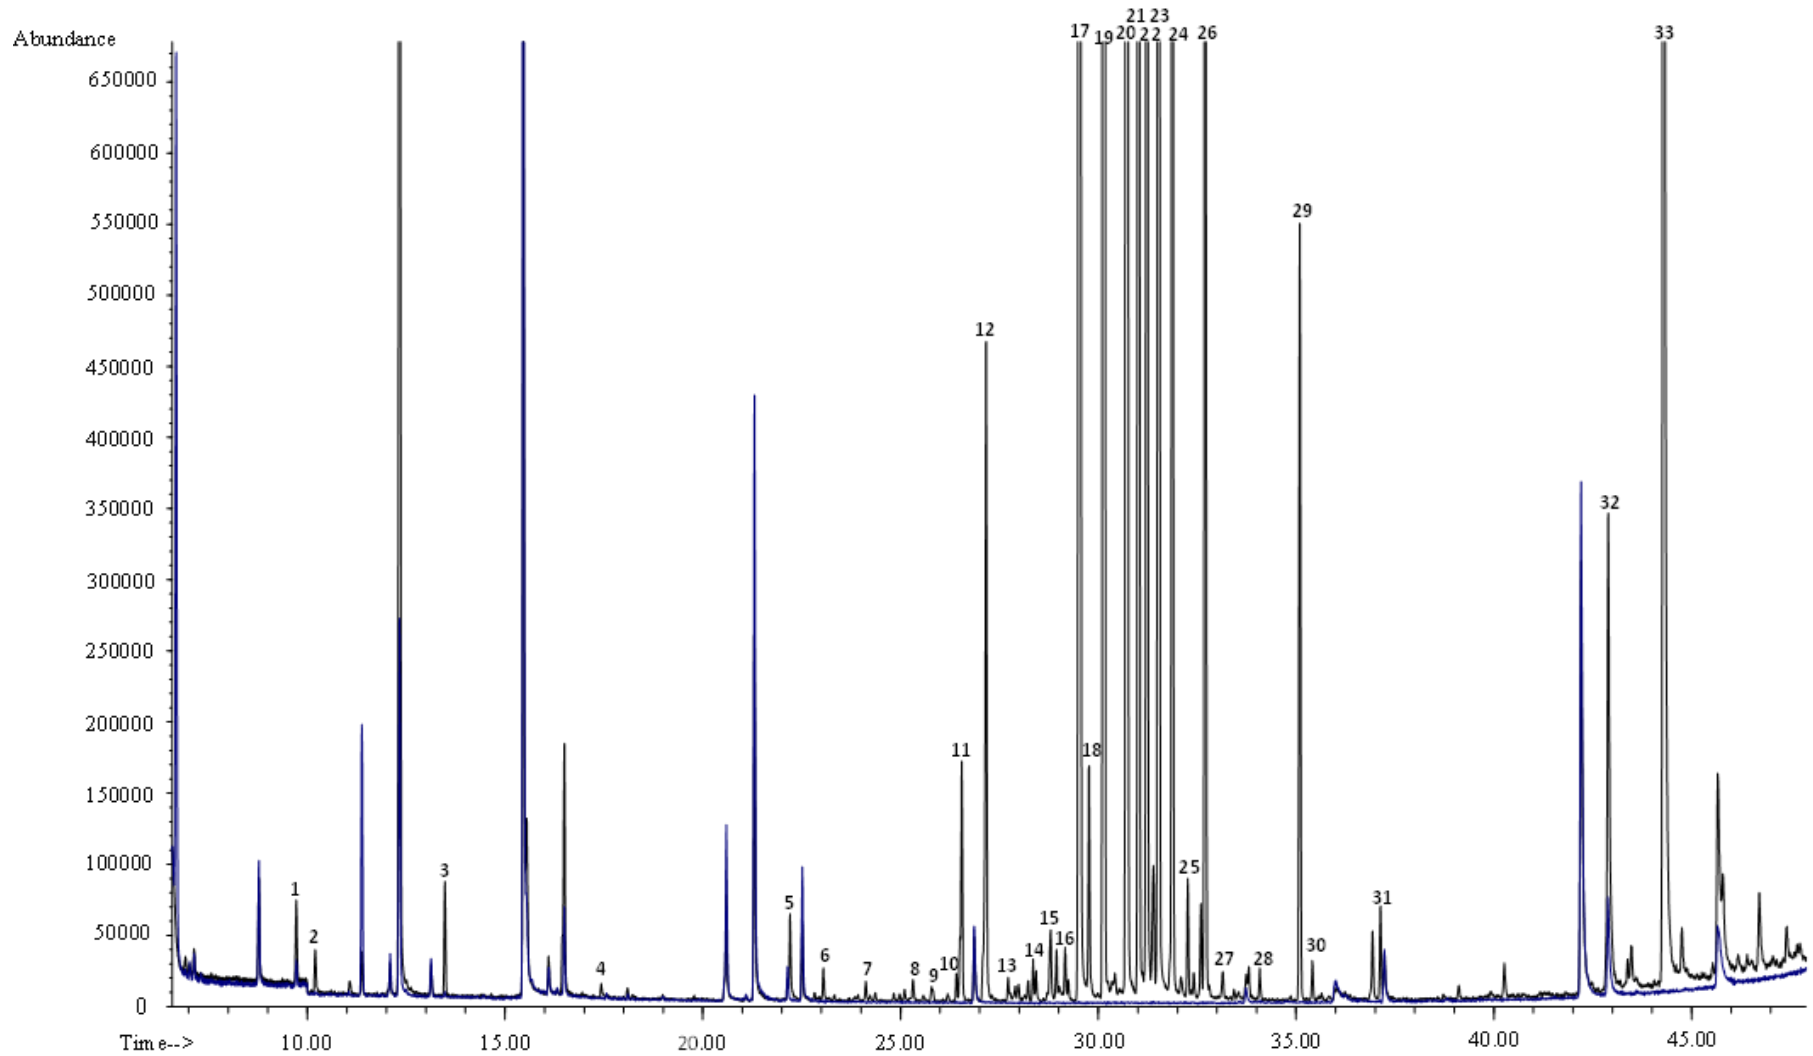

**GC-MS chromatogram to show the primary metabolites identified in the pine-based media. The Y-axis indicates the abundance of the metabolites, and the X-axis indicates time (min).**

| Primary metabolites identified using GC-MS in Figure 2. |                              |
|---------------------------------------------------------|------------------------------|
| 1. Acetic acid                                          | 18. Deoxy-pentamic acid      |
| 2. Alanine                                              | 19. Myo-Inositol             |
| 3. Hydroxy-methoxy-benzoic acid                         | 20. Unidentified diterpenoid |
| 4. Succinate                                            | 21. Fructose                 |
| 5. Malate                                               | 22. Fructose                 |
| 6. Butanate                                             | 23. Glucose                  |
| 7. Trihydroxybuturic acid                               | 24. Mannose                  |
| 8. Pentose sugar                                        | 25. Talose                   |
| 9. Trimethoxybenzene                                    | 26. Myo-Inositol             |
| 10. Xylose                                              | 27. Glucose                  |
| 11. Ribose                                              | 28. Hexose sugar             |
| 12. Galactose                                           | 29. Inositol derivative      |
| 30. Pentose sugar                                       | 30. Inositol derivative      |
| 31. Glucuronic acid                                     | 31. Hexose sugar             |
| 3. Ribonic acid                                         | 32. Hexadecanoic acid        |
| 33. Ribonic acid                                        | 33. Sucrose                  |
| 34. Deoxy-mannose                                       |                              |
