# Supplementary material for: Identification and Characterization of a QTL for Growth of Fusarium circinatum on Pine-Based Medium
Source: MDPI journal article supplement (doi:10.3390/jof8111214), 2022-11-16
Supplement: s1 [file s1]

## Identification and characterization of a QTL for growth of *Fusarium circinatum* on pine-based medium

Benedicta S. Swalarsk-Parry<sup>1</sup>, E.T. Steenkamp<sup>1</sup>, S. van Wyk<sup>1</sup>, Q.C. Santana<sup>1,2</sup>, M.A. van der Nest<sup>1,2</sup>, A. Hammerbacher<sup>3</sup>, B.D. Wingfield<sup>1</sup> and L. De Vos<sup>1</sup>

<sup>1</sup>Department of Biochemistry, Genetics and Microbiology, Forestry and Agricultural Biotechnology Institute (FABI), University of Pretoria, Pretoria 0002, South Africa.

<sup>2</sup>Agricultural Research Council, Biotechnology Platform, 100 Old Soutpan Road, Onderstepoort, Pretoria, South Africa.

<sup>3</sup>Department of Zoology and Entomology, Forestry and Agricultural Biotechnology Institute (FABI), University of Pretoria, Pretoria 0002, South Africa.

### Supplementary File S2

#### The sequence of the primers used to confirm the absence or presence of genes and regions targeted in this study.

| Primer name        | Primer sequence (5' to 3') | Target gene | Target region         |
|--------------------|----------------------------|-------------|-----------------------|
| P <sub>73F</sub>   | ACTCCCCAACTGACTCATGG       | g13407      | 1 194 142 - 1 195 143 |
| P <sub>73R</sub>   | CCACTCGCTTCCAAACACAA       |             |                       |
| P <sub>74F</sub>   | CAGTTGGCACTAGTCCTCCA       | g13408      | 1 198 252 - 1 198 921 |
| P <sub>74R</sub>   | TCAGGATCGATACCAAGGGC       |             |                       |
| P <sub>4F</sub>    | TTGCCCTCTCCAGTACCAAG       | FSP34 indel | 1 119 532 - 1 127 164 |
| P <sub>5R</sub>    | TGTCTTTGGTTCACACGCTG       |             |                       |
| KS17 <sub>F</sub>  | GATGACAAACCGGCTCACTC       | g13276      | 1 206 036 - 1 208 265 |
| KS17 <sub>R</sub>  | CAGCCATGAGACGGTAAAGC       |             |                       |
| FSP34 <sub>F</sub> | CATGGACGCGTCAAGTACTG       | g13376      | 1 165 752 - 1 168 139 |
| FSP34 <sub>R</sub> | TGCTTGCAGGTTCAAAGGTC       |             |                       |
| FT <sub>F</sub>    | GGTGGTGCTAAGGACTCACT       | g13420      | 1 238 853 - 1 242 201 |
| FT <sub>R</sub>    | GGTGCTCGCTTTCCAATAGG       |             |                       |

#### Cycling conditions using the KAPA Taq PCR kit (Kapa Biosystems) – these conditions were mainly used for the genes g13407 and g13408

| Step                 | Temperature | Time         | Cycles |
|----------------------|-------------|--------------|--------|
| Initial Denaturation | 95 °C       | 3 min        | 1      |
| Denaturation         | 95 °C       | 30 seconds   | 30     |
| Annealing            | variable *  | 30 seconds   |        |
| Extension            | 72 °C       | 1 min per kb | 1      |
| Final Extension      | 72 °C       | 5 minutes    |        |
| Hold                 | 4 °C        | ∞            |        |

\*Annealing temperature for primer set P<sub>73F+R</sub> = 57 °C primer set P<sub>74F+R</sub> = 56 °C

**Cycling conditions using the LongAmp® Taq 2X Master Mix (New England BioLabs) – these conditions were mainly used for the indel in *F. circinatum* FSP34**

| Step                 | Temperature | Time                          | Cycles |
|----------------------|-------------|-------------------------------|--------|
| Initial Denaturation | 94 °C       | 30 seconds                    | 1      |
| Denaturation         | 94 °C       | 30 seconds                    |        |
| Annealing            | 55 °C       | 1 minute                      | 10     |
| Extension            | 65 °C       | 8 minutes                     |        |
| Denaturation         | 94 °C       | 30 seconds                    |        |
| Annealing            | 55 °C       | 1 minute                      | 20     |
| Extension            | 65 °C       | 8 minutes + 20 sec each cycle |        |
| Final Extension      | 65 °C       | 10 minutes                    | 1      |
| Hold                 | 4 °C        | ∞                             |        |

**LongAmp® Taq 2X Master Mix (New England BioLabs) protocol to amplify three different genes\* in CMWF350 (FSP34), CMWF389, and CMWF674 (KS17).**

| Step                 | Temperature | Time                 | Cycles |
|----------------------|-------------|----------------------|--------|
| Initial Denaturation | 94 °C       | 30 seconds           | 1      |
| Denaturation         | 94 °C       | 30 seconds           |        |
| Annealing            | 52 °C       | 30 seconds           | 30     |
| Extension            | 65 °C       | 2 minutes 30 seconds |        |
| Final Extension      | 65 °C       | 10 minutes           | 1      |
| Hold                 | 4 °C        | ∞                    |        |

\*Primer set FSP34<sub>F+R</sub>, KS17<sub>F+R</sub>, and FT<sub>F+R</sub> were used to amplify the different genes in *F. circinatum* (FSP34 and KS17) and *F. temperatum* (CMWF389).
